# Supplementary material for: How Well Do CMIP6 Models Simulate the Greening of the Tibetan Plateau?
Source: MDPI journal article supplement (doi:10.3390/rs14184633), 2022-09-16
Supplement: s1 [file remotesensing-1821232-supplementary.pdf › remotesensing-1821232-supplementary.pdf]

## Supplementary

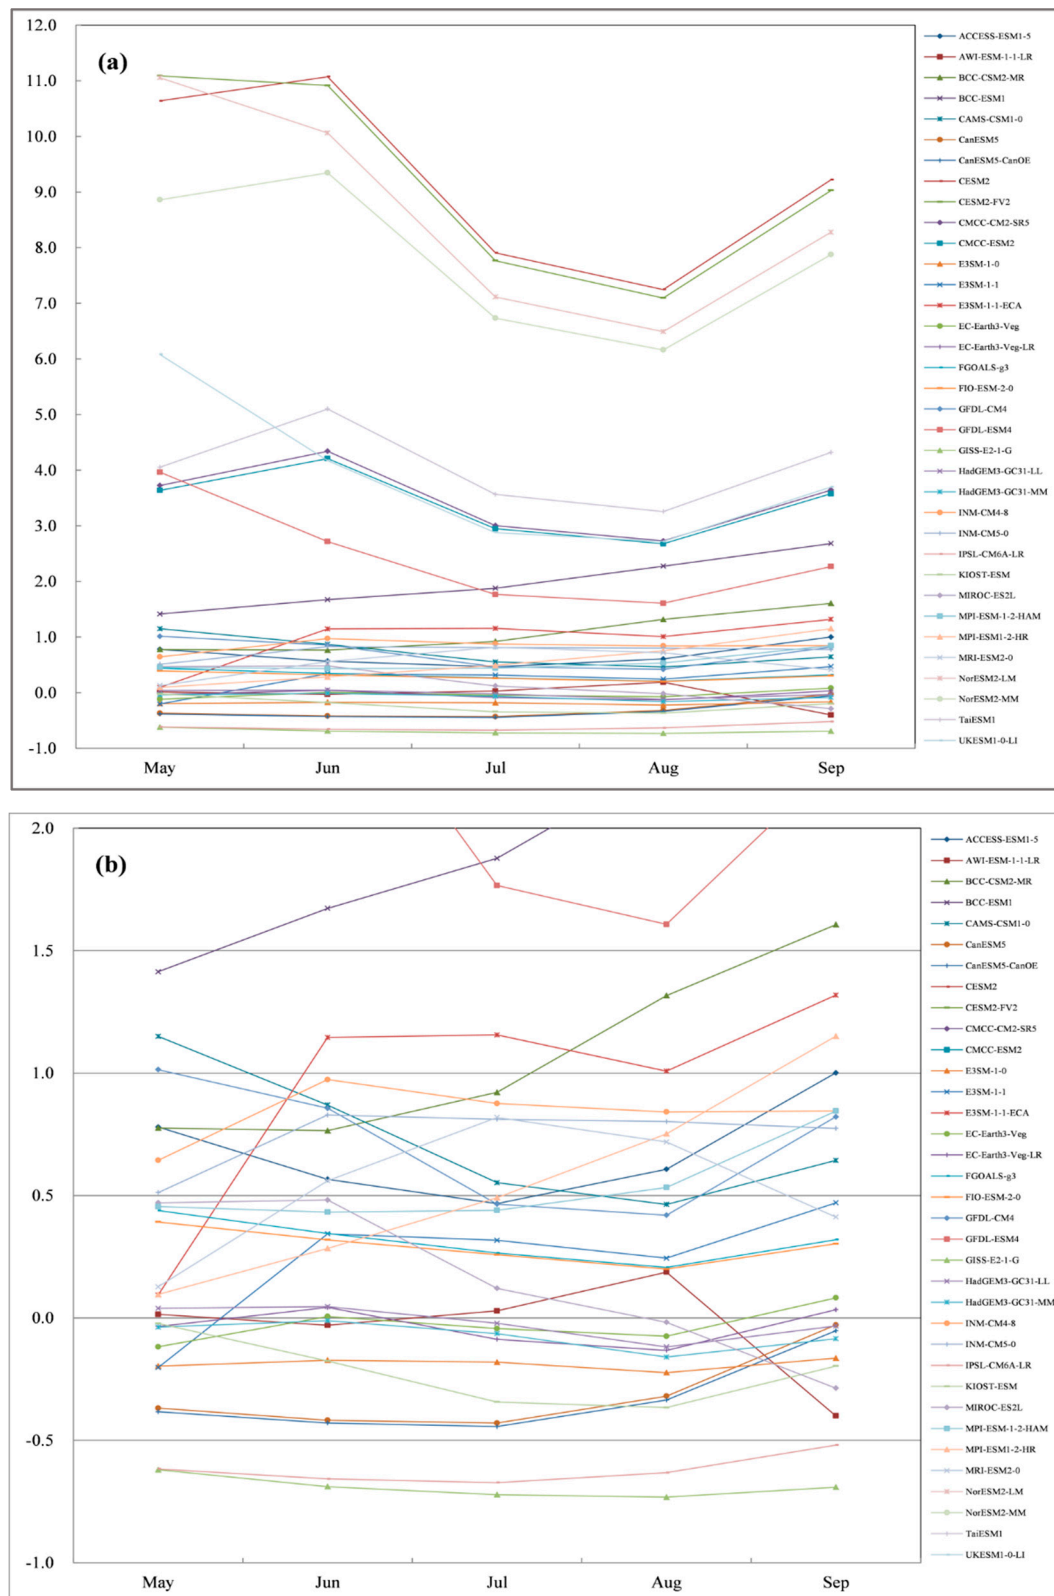

**Figure S1.** The relative bias of the monthly LAI of the simulations and observations. The y-axis is from – 1 to 12 in (a), and from –1 to 2 in (b).

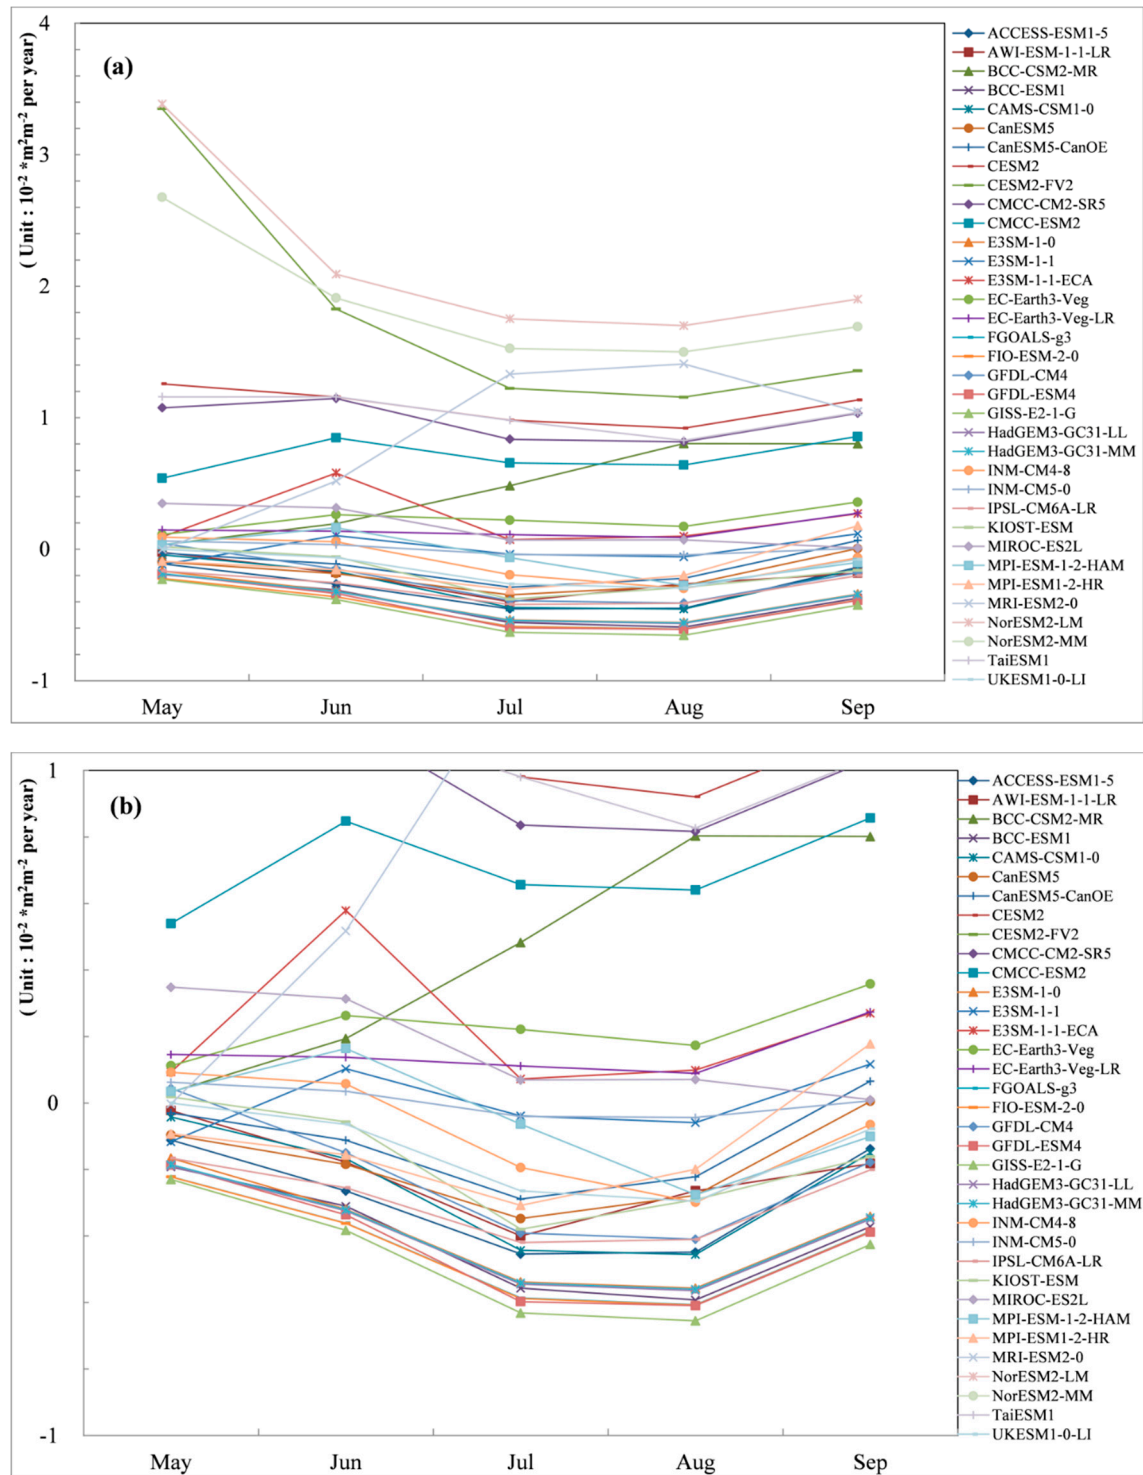

**Figure S2.** The bias of the monthly LAI trend with simulations and observations. The y-axis is from -1 to 3.5 in (a), and from -1 to 1 in (b).

**Table S1.** Summary of evaluation metrics and error ranking for models with the performance to simulate the LAI of Tibetan Plateau during growing season in1981-2014.

| Model            | Metrics/Ranking    |                      |           |           | Error ranking |
|------------------|--------------------|----------------------|-----------|-----------|---------------|
|                  | Patter_correlation | Bias  <sub>avg</sub> | RMSE      | Ratio     |               |
| HadGEM3-GC31-MM  | 0.934/ 1           | 0.204/ 1             | 0.355/ 1  | 0.696/ 14 | 1             |
| HadGEM3-GC31-LL  | 0.909/ 3           | 0.239/ 3             | 0.399/ 2  | 0.658/ 15 | 2             |
| E3SM-1-0         | 0.921/ 2           | 0.216/ 2             | 0.414/ 3  | 0.627/ 16 | 3             |
| CanESM5          | 0.892/ 6           | 0.267/ 4             | 0.416/ 4  | 0.816/ 10 | 4             |
| CanESM5-CanOE    | 0.893/ 5           | 0.272/ 5             | 0.421/ 5  | 0.803/ 11 | 5             |
| MPI-ESM1-2-HR    | 0.867/ 10          | 0.449/ 16            | 0.559/ 10 | 0.919/ 3  | 6             |
| EC-Earth3-Veg    | 0.816/ 16          | 0.394/ 7             | 0.554/ 9  | 1.166/ 9  | 7             |
| FIO-ESM-2-0      | 0.883/ 8           | 0.412/ 9             | 0.519/ 7  | 0.518/ 18 | 8             |
| MIROC-ES2L       | 0.731/ 23          | 0.420/ 10            | 0.584/ 11 | 0.915/ 4  | 9             |
| MPI-ESM-1-2-HAM  | 0.808/ 18          | 0.452/ 17            | 0.602/ 14 | 0.945/ 1  | 10            |
| ACCESS-ESM1-5    | 0.894/ 4           | 0.477/ 18            | 0.678/ 17 | 0.753/ 12 | 11            |
| FGOALS-g3        | 0.866/ 11          | 0.433/ 13            | 0.542/ 8  | 0.499/ 19 | 12            |
| AWI-ESM-1-1-LR   | 0.803/ 20          | 0.380/ 6             | 0.512/ 6  | 1.594/ 21 | 13            |
| EC-Earth3-Veg-LR | 0.779/ 22          | 0.435/ 14            | 0.594/ 12 | 1.141/ 8  | 14            |
| CAMS-CSM1-0      | 0.859/ 13          | 0.521/ 19            | 0.602/ 13 | 0.733/ 13 | 15            |
| INM-CM5-0        | 0.812/ 17          | 0.572/ 22            | 0.676/ 16 | 0.888/ 5  | 16            |
| KIOST-ESM        | 0.707/ 24          | 0.428/ 11            | 0.684/ 18 | 1.113/ 7  | 17            |
| E3SM-1-1         | 0.689/ 25          | 0.449/ 15            | 0.693/ 19 | 1.069/ 2  | 18            |
| IPSL-CM6A-LR     | 0.802/ 21          | 0.398/ 8             | 0.629/ 15 | 0.623/ 17 | 19            |
| INM-CM4-8        | 0.824/ 15          | 0.599/ 23            | 0.701/ 20 | 0.887/ 6  | 20            |
| GISS-E2-1-G      | 0.849/ 14          | 0.432/ 12            | 0.759/ 21 | 0.281/ 25 | 21            |
| MRI-ESM2-0       | 0.883/ 7           | 0.541/ 20            | 0.923/ 23 | 1.808/ 28 | 22            |
| BCC-CSM2-MR      | 0.870/ 9           | 0.689/ 24            | 0.993/ 24 | 1.594/ 22 | 23            |
| GFDL-CM4         | 0.866/ 12          | 0.545/ 21            | 0.917/ 22 | 1.733/ 26 | 24            |
| BCC-ESM1         | 0.805/ 19          | 1.254/ 26            | 1.547/ 26 | 1.744/ 27 | 25            |
| E3SM-1-1-ECA     | 0.660/ 29          | 0.732/ 25            | 1.122/ 25 | 1.512/ 20 | 26            |
| GFDL-ESM4        | 0.687/ 26          | 1.382/ 27            | 1.722/ 27 | 1.717/ 24 | 27            |
| UKESM1-0-LI      | 0.602/ 31          | 2.199/ 30            | 2.440/ 28 | 1.616/ 23 | 28            |
| CMCC-ESM2        | 0.665/ 27          | 2.038/ 28            | 2.635/ 29 | 2.605/ 29 | 29            |
| CMCC-CM2-SR5     | 0.663/ 28          | 2.083/ 29            | 2.682/ 30 | 2.628/ 30 | 30            |
| TaiESM1          | 0.626/ 30          | 2.407/ 31            | 3.020/ 31 | 2.709/ 31 | 31            |
| NorESM2-MM       | 0.440/ 32          | 4.559/ 32            | 5.020/ 32 | 2.839/ 32 | 32            |
| NorESM2-LM       | 0.436/ 33          | 4.954/ 33            | 5.420/ 33 | 2.960/ 33 | 33            |
| CESM2-FV2        | 0.392/ 34          | 5.332/ 34            | 5.803/ 34 | 3.032/ 34 | 34            |
| CESM2            | 0.359/ 35          | 5.387/ 35            | 5.977/ 35 | 3.385/ 35 | 35            |

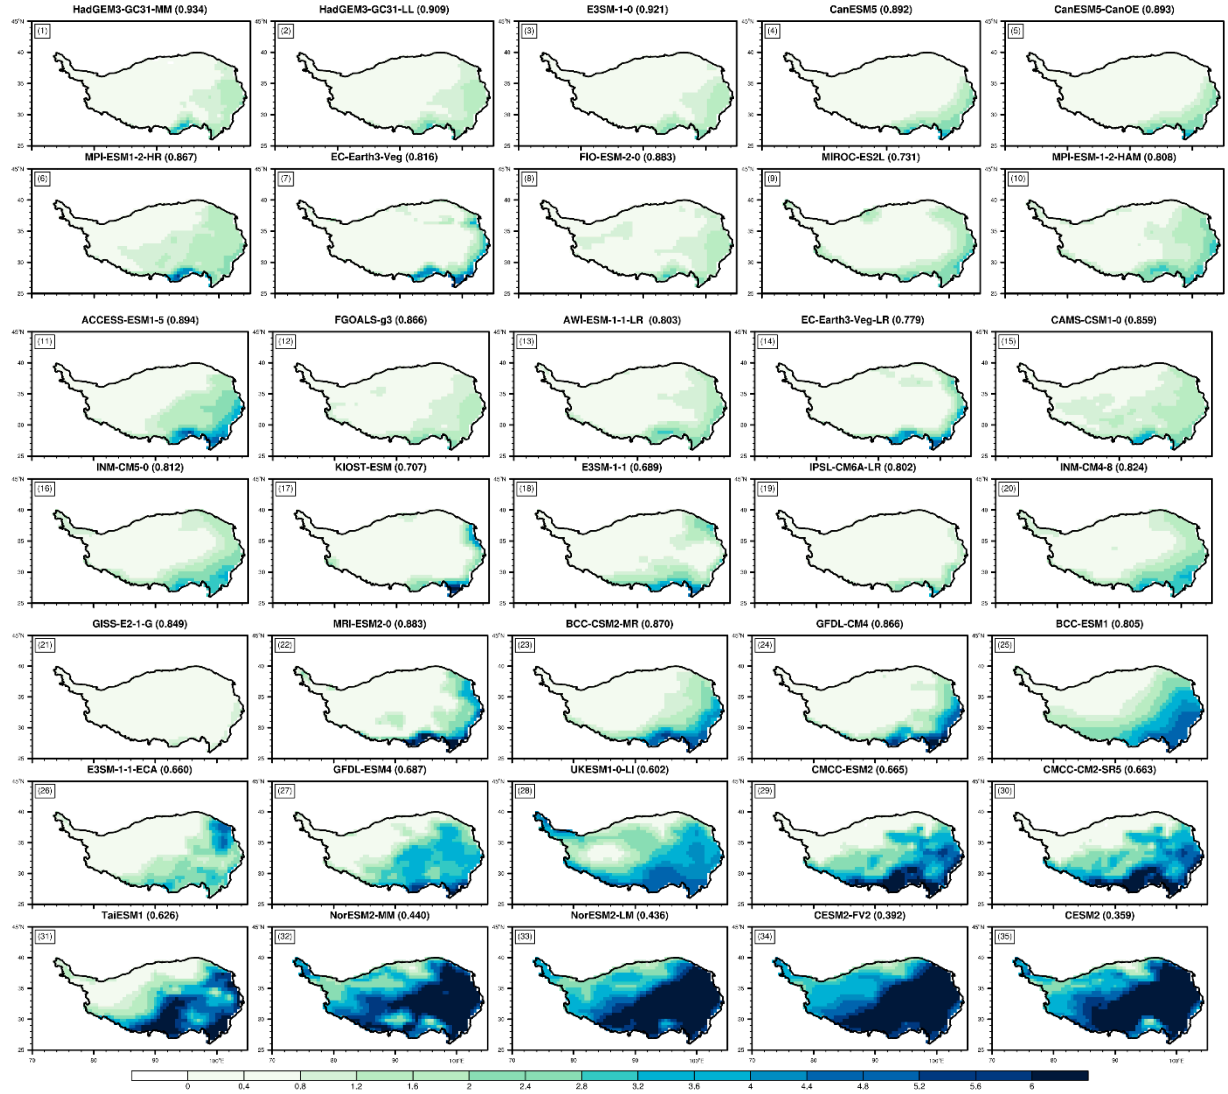

**Figure S3.** Spatial distributions of the simulated LAI during the growing season. The number in parentheses in Figure S3 show the pattern correlation value between the simulations and observations.

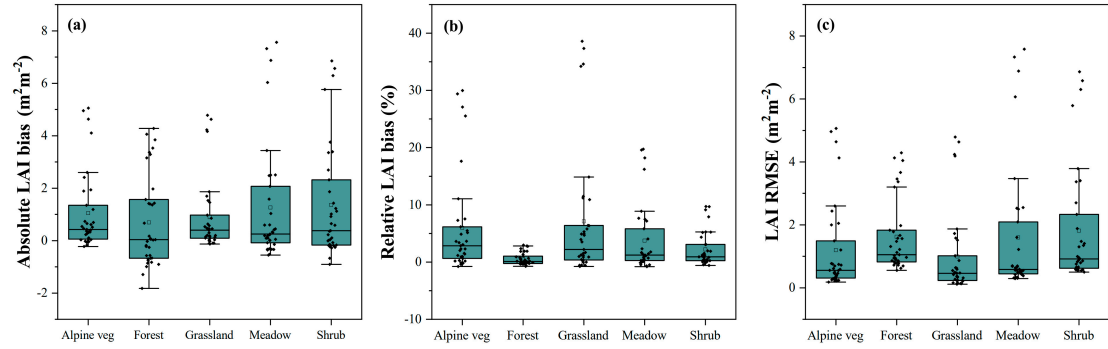

**Figure S4.** The distribution of bias, relative bias and RMSE between the simulated and observed LAI with 35 CMIP6 models for different vegetation types; the LAI is the averaged LAI during the growing season in 1981-2014.

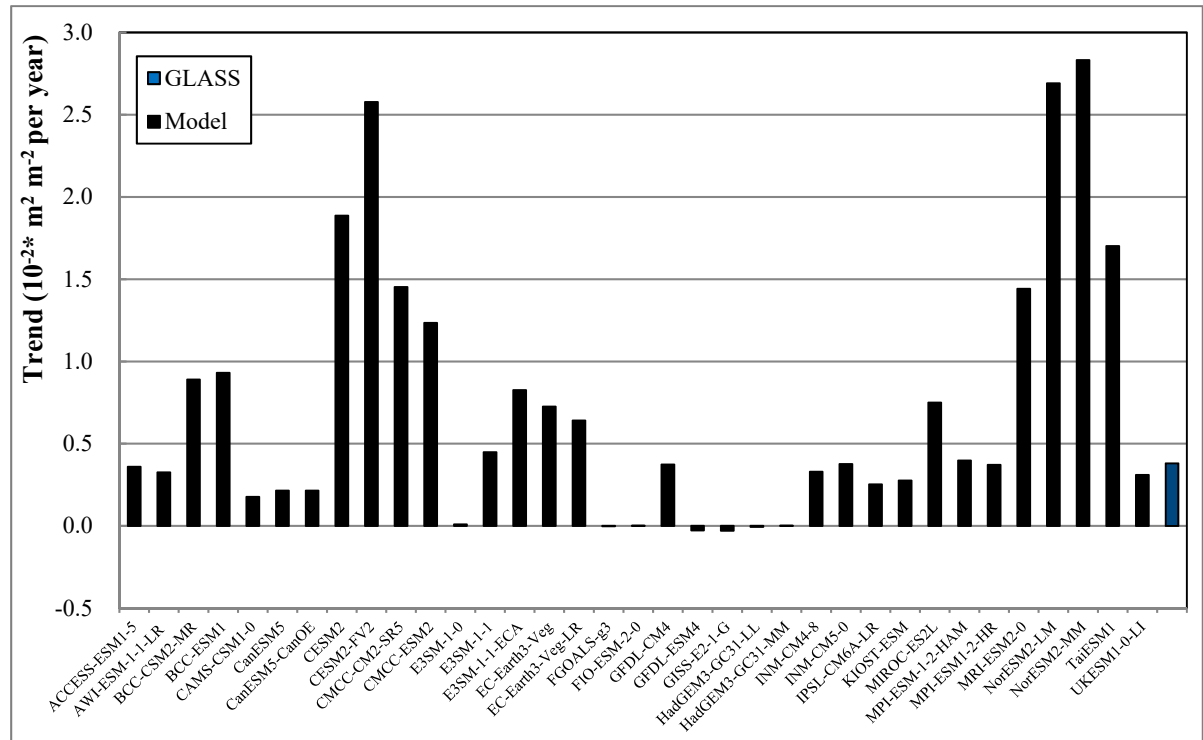

**Figure S5.** The area-averaged linear trend of simulated and observed LAI the during the growing season ( $p < 0.05$ )

**Table S2.** Summary of evaluation metrics and error ranking for models with the performance to simulate the LAI trend of Tibetan Plateau during growing season in1981-2014.

| Model            | Metrics/Ranking    |                                         |                         |           | Error ranking |
|------------------|--------------------|-----------------------------------------|-------------------------|-----------|---------------|
|                  | Patter_correlation | Bias <sub>avg</sub> (10 <sup>-3</sup> ) | RMSE(10 <sup>-3</sup> ) | Ratio     |               |
| E3SM-1-1         | 0.583/ 5           | 2.585/ 1                                | 4.091/ 2                | 1.112/ 2  | 1             |
| MPI-ESM-1-2-HAM  | 0.578/ 6           | 2.765/ 2                                | 3.979/ 1                | 0.567/ 10 | 2             |
| CanESM5          | 0.613/ 4           | 3.113/ 6                                | 4.702/ 6                | 0.524/ 11 | 3             |
| INM-CM5-0        | 0.486/ 13          | 2.969/ 4                                | 4.242/ 3                | 0.306/ 17 | 4             |
| BCC-ESM1         | 0.641/ 3           | 4.840/ 16                               | 6.060/ 14               | 1.175/ 5  | 5             |
| MIROC-ES2L       | 0.456/ 15          | 3.994/ 12                               | 5.514/ 11               | 1.067/ 1  | 6             |
| AWI-ESM-1-1-LR   | 0.312/ 19          | 3.045/ 5                                | 4.710/ 7                | 0.651/ 9  | 7             |
| INM-CM4-8        | 0.345/ 16          | 2.807/ 3                                | 4.391/ 4                | 0.294/ 18 | 8             |
| CanESM5-CanOE    | 0.325/ 18          | 3.231/ 8                                | 5.007/ 9                | 0.733/ 7  | 9             |
| BCC-CSM2-MR      | 0.641/ 2           | 4.672/ 14                               | 6.759/ 16               | 1.487/ 12 | 10            |
| ACCESS-ESM1-5    | 0.085/ 27          | 3.556/ 10                               | 5.071/ 10               | 0.883/ 3  | 11            |
| GFDL-CM4         | -0.150/ 32         | 3.253/ 9                                | 4.746/ 8                | 0.849/ 4  | 12            |
| MPI-ESM1-2-HR    | 0.103/ 26          | 3.115/ 7                                | 4.456/ 5                | 0.362/ 16 | 13            |
| CAMS-CSM1-0      | 0.511/ 12          | 3.989/ 11                               | 5.804/ 12               | 0.186/ 20 | 14            |
| E3SM-1-1-ECA     | 0.532/ 9           | 5.517/ 24                               | 7.089/ 21               | 1.331/ 8  | 15            |
| IPSL-CM6A-LR     | 0.239/ 21          | 5.069/ 18                               | 7.066/ 20               | 0.764/ 6  | 16            |
| EC-Earth3-Veg-LR | 0.235/ 22          | 5.054/ 17                               | 7.064/ 19               | 1.536/ 13 | 17            |
| EC-Earth3-Veg    | 0.336/ 17          | 5.109/ 20                               | 7.312/ 23               | 1.604/ 15 | 18            |
| E3SM-1-0         | 0.547/ 7           | 5.305/ 21                               | 7.371/ 24               | 0.036/ 23 | 19            |
| FIO-ESM-2-0      | 0.046/ 28          | 4.230/ 13                               | 6.024/ 13               | 0.022/ 25 | 20            |
| HadGEM3-GC31-LL  | 0.133/ 25          | 5.474/ 23                               | 7.060/ 18               | 0.082/ 21 | 21            |
| FGOALS-g3        | 0.043/ 30          | 4.692/ 15                               | 6.597/ 15               | 0.021/ 27 | 22            |
| HadGEM3-GC31-MM  | 0.046/ 29          | 5.473/ 22                               | 6.830/ 17               | 0.034/ 24 | 23            |
| CMCC-ESM2        | 0.149/ 24          | 9.483/ 27                               | 11.818/ 28              | 1.778/ 19 | 24            |
| CESM2-FV2        | 0.644/ 1           | 22.634/ 32                              | 25.780/ 32              | 3.266/ 33 | 25            |
| UKESM1-0-LI      | -0.462/ 34         | 8.485/ 26                               | 10.298/ 26              | 1.571/ 14 | 26            |
| KIOST-ESM        | -0.104/ 31         | 5.081/ 19                               | 7.627/ 25               | 1.978/ 26 | 27            |
| CMCC-CM2-SR5     | 0.288/ 20          | 11.001/ 28                              | 13.525/ 29              | 2.065/ 28 | 28            |
| NorESM2-LM       | 0.525/ 10          | 23.957/ 33                              | 26.065/ 33              | 2.595/ 30 | 29            |
| NorESM2-MM       | 0.543/ 8           | 24.742/ 34                              | 27.579/ 35              | 3.092/ 31 | 30            |
| MRI-ESM2-0       | 0.457/ 14          | 13.356/ 29                              | 20.047/ 31              | 3.987/ 34 | 31            |
| CESM2            | 0.512/ 11          | 20.645/ 31                              | 26.216/ 34              | 4.610/ 35 | 32            |
| GISS-E2-1-G      | -0.518/ 35         | 5.316/ 35                               | 7.098/ 22               | 0.063/ 22 | 33            |
| GFDL-ESM4        | -0.153/ 33         | 7.096/ 25                               | 10.895/ 27              | 2.210/ 29 | 34            |
| TaiESM1          | 0.178/ 23          | 14.526/ 30                              | 19.292/ 30              | 3.131/ 32 | 35            |

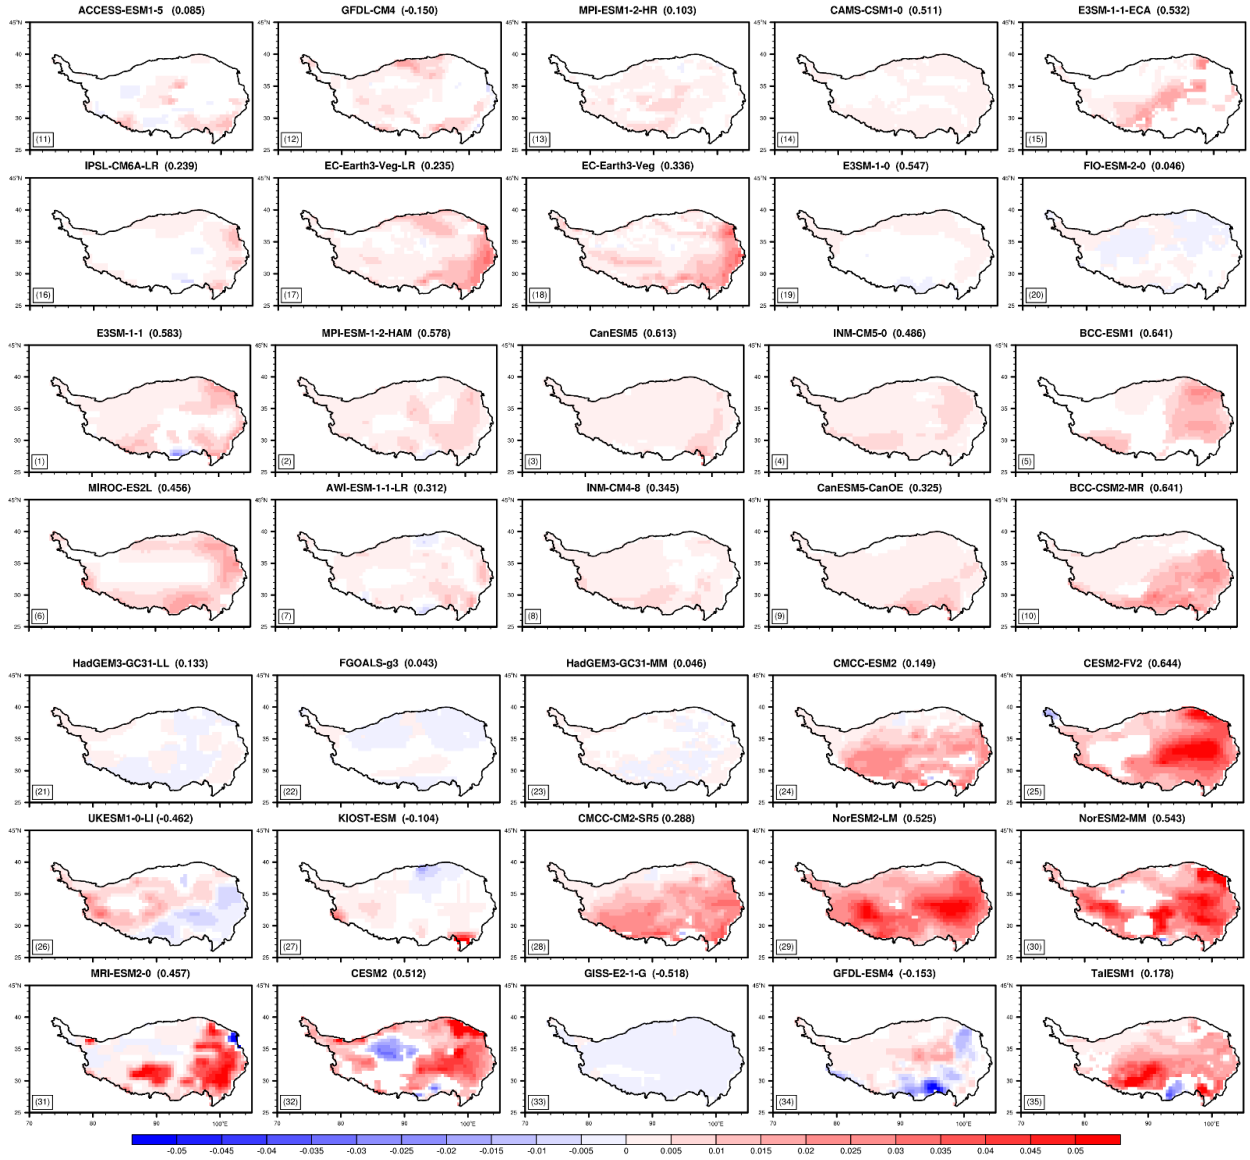

**Figure S6.** Spatial distributions of the simulated LAI linear trend during the growing season. The number in parentheses in Figure S6 showed the pattern correlation value between the simulations and observations.

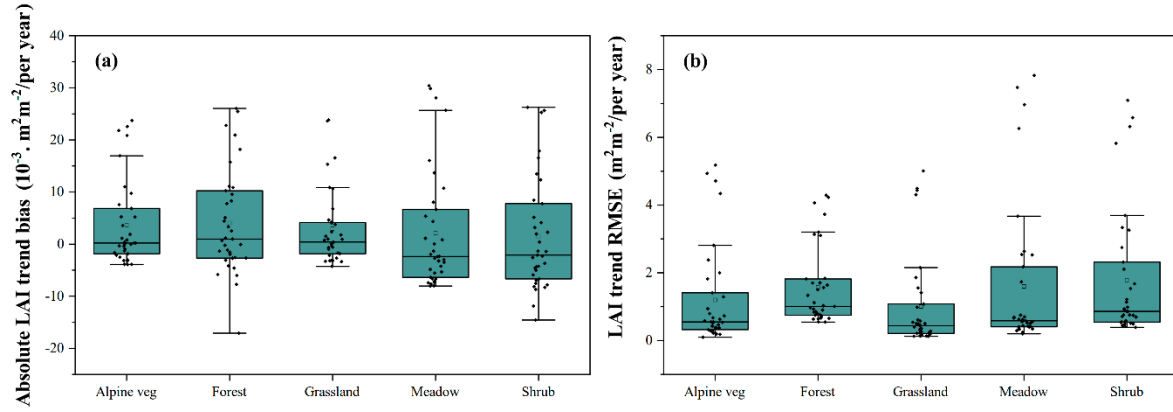

**Figure S7.** The distribution of bias and RMSE between the simulated and observed LAI trend with 35 CMIP6 models for different vegetation types; the LAI trend is the linear regression trend of the average LAI during the growing season from 1981 to 2014.

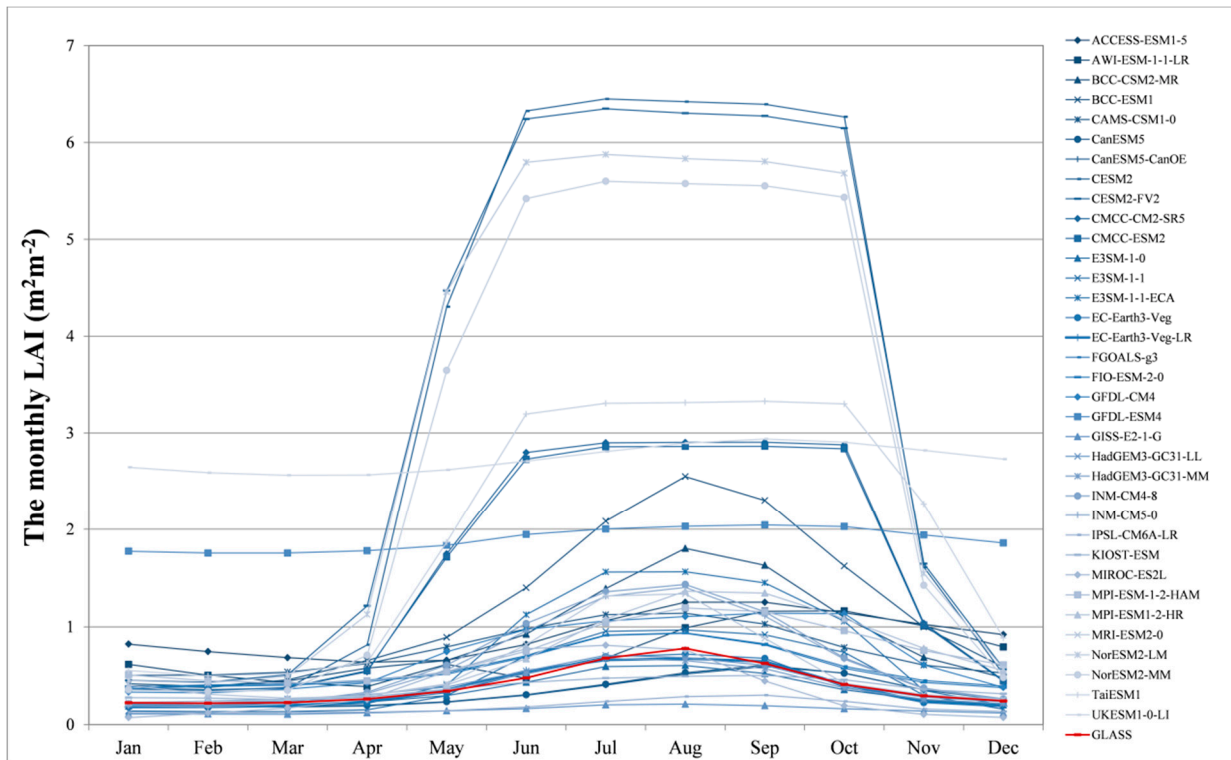

**Figure S8.** The monthly LAI of 35 CMIP6 models from 1981 to 2014.
